# Supplementary material for: Cell-Free DNA Sequencing Reveals Gene Variants in DNA Damage Repair Genes Associated with Prognosis of Prostate Cancer Patients
Source: MDPI journal article supplement (doi:10.3390/cells11223618), 2022-11-15
Supplement: s1 [file s1]

# Supplemental Table S1

## Cell-Free DNA Sequencing reveals Gene Variants in DNA Damage Repair Genes associated with Prognosis in Prostate Cancer Patients

Verena Lieb<sup>1,2</sup>, Amer Abdulrahman<sup>1,2</sup>, Katrin Weigelt<sup>1,2</sup>, Siegfried Hauch<sup>3</sup>, Michael Gombert<sup>3</sup>, Juan Guzman<sup>1,2</sup>, Laura Bellut<sup>1,2</sup>, Peter Goebell<sup>1,2</sup>, Robert Stöhr<sup>2,4</sup>, Arndt Hartmann<sup>2,4</sup>, Bernd Wullich<sup>1,2</sup>, Helge Taubert<sup>1,2,5,\*</sup>, Sven Wach<sup>1,2,5</sup>

**Suppl. Table S1.** Clinicopathological data, treatment and study data

| Parameter                                                | n                   |
|----------------------------------------------------------|---------------------|
| Patients                                                 | 34                  |
| Samples                                                  | 39                  |
| Age, median (range) in years                             | 67 (48-89)          |
| Metastasis                                               |                     |
| cM0                                                      | 3                   |
| cM1                                                      | 31                  |
| cfDNA, mean (range) in ng/ml                             | 17.93 (2.37-206.25) |
| CTC-positive patients (samples)                          | 9 (11)              |
| AR-V7-CTC-positive patients (samples)                    | 3 (4)               |
| Survival time, median (range) in months                  | 48 (6-182)          |
| Overall survival                                         |                     |
| Alive                                                    | 24                  |
| Dead                                                     | 10                  |
| Disease-specific survival                                |                     |
| Yes                                                      | 25                  |
| No                                                       | 9                   |
| Time from blood sampling to last contact, median (range) | 10 (0-61)           |
| Time from metastasis to last follow up, median (range)   | 31 (11-133)         |
| Time to treatment change                                 | 9 (1-40)            |
| Treatment change                                         |                     |
| Yes                                                      | 24                  |
| No                                                       | 8                   |
| Not known                                                | 2                   |
| Pretreatment                                             |                     |
| None                                                     | 6                   |
| Depriv                                                   | 10                  |
| AE                                                       | 8                   |
| Tax                                                      | 3                   |
| Multiple                                                 | 7                   |
| Treatment                                                |                     |
| AE                                                       | 10                  |
| Tax                                                      | 18                  |
| Chemotherapy/hormone                                     | 6                   |
| Pretreatment + treatment                                 |                     |

|                             |   |
|-----------------------------|---|
| None + chemotherapy/hormone | 6 |
| Depriv + AE                 | 5 |
| Tax + AE                    | 4 |
| Mult + AE                   | 2 |
| Depriv + Tax                | 4 |
| AE + Tax                    | 8 |
| Mult + Tax                  | 5 |

---

Abbreviations: None, no pretreatment; Depriv, hormone deprivation; AE, antiandrogens abiraterone/enzalutamide; Tax, taxanes; Mult, multiple (both AE and Tax). Chemotherapy/hormone following none, AE following Depriv, AE following Tax, AE following Mult, Tax following Depriv, Tax following AE, Tax following Mult.
