# Supplementary material for: Cell-Free DNA Sequencing Reveals Gene Variants in DNA Damage Repair Genes Associated with Prognosis of Prostate Cancer Patients
Source: Cells. 2022 Nov 15;11(22):3618. doi: 10.3390/cells11223618 (PMC9688453; doi:10.3390/cells11223618)
Supplement: Supplementary file 1 [file cells-11-03618-s001.zip › Suppl. files/Suppl. Table S3.xlsx]

## Sheet: Tabelle1
Suppl. Table S3: DDR genes analyzed, with CPS/FI variants and association with prognosis
DDR genes analyzed	MSH2	MSH6	ERCC3	PMS1	MLH1	ATR	RAD50	PMS2	XRCC2	NBN	FNCC	MRE11	ATM	BRCA2	XRCC3	RAD51	ERCC4	PALB2	RAD51D	RAD51C	BRCA1	ERCC1	CHEK2
DDR Genes with variants
clinical pathogenic or likely pathogenic significant (CPS)	MSH2	MSH6	ERCC3	PMS1		ATR	RAD50	PMS2		NBN	FNCC	MRE11	ATM	BRCA2		RAD51	ERCC4	PALB2	RAD51D		BRCA1	ERCC1	CHEK2
functional impact (FI) loss or gain	MSH2	MSH6	ERCC3	PMS1	MLH1	ATR	RAD50	PMS2		NBN	FNCC	MRE11	ATM	BRCA2	XRCC3	RAD51	ERCC4	PALB2	RAD51D	RAD51C	BRCA1	ERCC1	CHEK2
DDR Genes with variants associated with good prognosis
pathogenic or likely pathogenic significant (CPS)		MSH6	ERCC3	PMS1						NBN	FANCC						ERCC4					ERCC1
functional impact (FI) loss or gain					MLH1						FANCC						ERCC4					ERCC1
